# Supplementary material for: A Population-Based Registry Analysis on Hospitalized COVID-19 Patients with Previous Cardiovascular Disease: Clinical Profile, Treatment, and Predictors of Death
Source: MDPI journal article supplement (doi:10.3390/jcdd8120167), 2021-11-29
Supplement: s1 [file s1]

**Supplementary Table S1.** List of medicines used in the COVID-19 treatment according to Spanish guidelines [26,27].

| Medicines Type | ATC Code | Medicine           | Medicines Type  | ATC Code | Medicine                |
|----------------|----------|--------------------|-----------------|----------|-------------------------|
| Antibiotics    | J01DD01  | Cefotaxime         | Anti SIRS Drugs | L01XE18  | Ruxolitinib             |
|                | J01DD04  | Ceftriaxone        |                 | L03AB05  | Interferon alpha 2b     |
|                | J01DD16  | Cefditoren         |                 | L03AB08  | Interferon beta 1b      |
|                | J01DI02  | Ceftaroline        |                 | L04AA37  | Baricitinib             |
|                | J01FA09  | Clarithromycin     |                 | L04AC03  | Anakinra                |
|                | J01FA10  | Azithromycin       |                 | L04AC07  | Tocilizumab             |
|                | J01MA12  | Levofloxacin       |                 | L04AC11  | Siltuximab              |
|                | J01MA14  | Moxifloxacin       |                 | L04AC14  | Sarilumab               |
| Antimalarials  | J01XA02  | Teicoplanine       | Antivirals      | J05AR10  | Lopinavir and Ritonavir |
|                | P01BA01  | Chloroquine        |                 | J05AX95* | Remdesivir              |
|                | P01BA02  | Hidroxychloroquine | Steroids        | H02AB04  | Methylprednisolone      |
|                |          |                    |                 | H02AB07  | Prednisone              |

Abbreviations: SIRS, systemic inflammatory response syndrome.

**Supplementary Table S2.** Treatment and clinical outcomes evolution of in-hospital COVID-19 patients with previous cardiovascular diseases (March 1<sup>st</sup> - May 31<sup>st</sup>, 2020).

| Medicines                          | 1-14 March<br>N=42         | 15-31 March<br>N=1086      | 1-14 April<br>N=733        | 15-30 April<br>N=444       | 1-14 May<br>N=174          | 15-31 May<br>N=139         |
|------------------------------------|----------------------------|----------------------------|----------------------------|----------------------------|----------------------------|----------------------------|
| <b>Antibiotics</b>                 | <b>80.95 (69.08-92.83)</b> | <b>92.73 (91.18-94.27)</b> | <b>93.32 (91.83-94.8)</b>  | <b>90.09 (88.31-91.87)</b> | <b>86.21 (84.16-88.26)</b> | <b>84.89 (82.76-87.02)</b> |
| Ceftriaxone                        | 52.38 (37.28-67.49)        | 73.66 (71.05-76.28)        | 70.53 (67.82-73.24)        | 66.67 (63.86-69.47)        | 67.82 (65.04-70.59)        | 61.87 (58.98-64.76)        |
| Azithromycin                       | 33.33 (19.08-47.59)        | 70.81 (68.11-73.51)        | 73.26 (70.63-75.89)        | 65.77 (62.94-68.59)        | 51.72 (48.75-54.7)         | 46.76 (43.8-49.73)         |
| Levofloxacin                       | 38.1 (23.41-52.78)         | 18.05 (15.76-20.34)        | 11.73 (9.82-13.65)         | 16.67 (14.45-18.88)        | 17.24 (14.99-19.49)        | 17.99 (15.7-20.27)         |
| Clarithromycin                     | 2.38 (0.23-4.99)           | 0.18 (0.07-0.30)           | 0 (0-0)                    | 0.9 (0.34-1.46)            | 0.57 (0.13-1.02)           | 2.16 (1.29-3.02)           |
| Teicoplanin                        | 0 (0-0)                    | 1.47 (0.76-2.19)           | 2.18 (1.31-3.05)           | 1.13 (0.5-1.75)            | 1.15 (0.52-1.78)           | 1.44 (0.73-2.15)           |
| Cefditoren                         | 0 (0-0)                    | 2.39 (1.48-3.3)            | 2.59 (1.65-3.54)           | 2.93 (1.93-3.93)           | 2.3 (1.41-3.19)            | 2.88 (1.88-3.87)           |
| Cefotaxime                         | 0 (0-0)                    | 0.09 (0.01-0.18)           | 0.27 (0.04-0.50)           | 0.23 (0.06-0.39)           | 0.57 (0.13-1.02)           | 0 (0-0)                    |
| Moxifloxacin                       | 0 (0-0)                    | 0 (0-0)                    | 0.55 (0.11-0.98)           | 0.23 (0.06-0.39)           | 0 (0-0)                    | 0 (0-0)                    |
| Ceftaroline                        | 0 (0-0)                    | 0.18 (0.07-0.30)           | 0 (0-0)                    | 0.23 (0.06-0.39)           | 0 (0-0)                    | 0 (0-0)                    |
| <b>Antimalarials</b>               | <b>61.9 (47.22-76.59)</b>  | <b>83.15 (80.92-85.38)</b> | <b>78.99 (76.57-81.41)</b> | <b>69.37 (66.63-72.11)</b> | <b>38.51 (35.61-41.4)</b>  | <b>25.9 (23.29-28.5)</b>   |
| Hydroxychloroquine                 | 59.52 (44.68-74.37)        | 76.7 (74.19-79.22)         | 74.76 (72.18-77.34)        | 68.69 (65.94-71.45)        | 37.36 (34.48-40.23)        | 24.46 (21.9-27.02)         |
| Chloroquine                        | 4.76 (0.68-9.2)            | 9.48 (7.74-11.23)          | 4.23 (3.03-5.43)           | 0.68 (0.19-1.16)           | 1.15 (0.52-1.78)           | 2.16 (1.29-3.02)           |
| <b>Steroids</b>                    | <b>52.38 (37.28-67.49)</b> | <b>44.84 (41.89-47.8)</b>  | <b>48.29 (45.32-51.27)</b> | <b>47.07 (44.1-50.04)</b>  | <b>43.68 (40.73-46.63)</b> | <b>52.52 (49.55-55.49)</b> |
| Methylprednisolone                 | 47.62 (32.51-62.72)        | 42.08 (39.14-45.02)        | 44.61 (41.65-47.57)        | 45.05 (42.09-48)           | 39.66 (36.75-42.56)        | 43.88 (40.93-46.84)        |
| Prednisone                         | 14.29 (3.7-24.87)          | 9.02 (7.32-10.73)          | 12.01 (10.07-13.94)        | 10.81 (8.96-12.66)         | 12.07 (10.13-14.01)        | 12.95 (10.95-14.95)        |
| <b>Antivirals</b>                  | <b>50 (34.88-65.12)</b>    | <b>61.14 (58.24-64.04)</b> | <b>43.11 (40.17-46.06)</b> | <b>22.07 (19.61-24.54)</b> | <b>10.34 (8.53-12.16)</b>  | <b>9.35 (7.62-11.08)</b>   |
| Lopinavir-Ritonavir                | 50 (34.88-65.12)           | 61.05 (58.15-63.95)        | 43.11 (40.17-46.06)        | 22.07 (19.61-24.54)        | 10.34 (8.53-12.16)         | 9.35 (7.62-11.08)          |
| Remdesivir                         | 0 (0-0)                    | 0.18 (0.07-0.30)           | 0 (0-0)                    | 0 (0-0)                    | 0 (0-0)                    | 0 (0-0)                    |
| <b>Tocilizumab</b>                 | <b>9.52 (0.65-18.4)</b>    | <b>10.22 (8.42-12.02)</b>  | <b>9.96 (8.18-11.74)</b>   | <b>5.63 (4.26-7)</b>       | <b>1.72 (0.95-2.5)</b>     | <b>1.44 (0.73-2.15)</b>    |
| <b>Others anti-SIRS</b>            | <b>26.19 (12.89-39.49)</b> | <b>13.72 (11.67-15.77)</b> | <b>5.32 (3.99-6.66)</b>    | <b>2.03 (1.19-2.87)</b>    | <b>2.3 (1.41-3.19)</b>     | <b>2.16 (1.29-3.02)</b>    |
| Interferon Beta                    | 26.19 (12.89-39.49)        | 12.52 (10.55-14.49)        | 2.32 (1.42-3.21)           | 0 (0-0)                    | 0 (0-0)                    | 1.44 (1.04-2.84)           |
| Anakinra                           | 0 (0-0)                    | 0.83 (0.29-1.37)           | 2.59 (1.65-3.54)           | 1.8 (1.01-2.59)            | 0.57 (0.13-1.02)           | 0.72 (0.22-1.22)           |
| Baricitinib                        | 0 (0-0)                    | 0.09 (0.01-0.18)           | 0.68 (0.19-1.17)           | 0.23 (0.06-0.39)           | 1.72 (0.95-2.5)            | 0 (0-0)                    |
| Siltuximab                         | 0 (0-0)                    | 0.18 (0.07-0.30)           | 0 (0-0)                    | 0 (0-0)                    | 0 (0-0)                    | 0 (0-0)                    |
| Ruxolitinib                        | 0 (0-0)                    | 0.18 (0.07-0.30)           | 0.14 (0.08-0.20)           | 0 (0-0)                    | 0 (0-0)                    | 0 (0-0)                    |
| Hospital LoS (median + IQR)        | 19.5 (9 -31)               | 10 (6-17)                  | 9 (6-16)                   | 9 (6-15)                   | 8 (6-15)                   | 9 (6-14)                   |
| ICU LoS (median + IQR)             | 26.5 (12-41)               | 17 (7-32)                  | 12 (4-21)                  | 6.5 (1-14)                 | 8.5 (6-10)                 | 8 (3-12)                   |
|                                    | N=8                        | N=106                      | N=29                       | N=8                        | N=4                        | N=4                        |
| Death (% 95 CI)                    | 69.05 (55.07-83.03)        | 41.44 (38.51-44.37)        | 28.24 (25.56-30.92)        | 24.55 (21.99-27.11)        | 25.29 (22.7-27.87)         | 16.55 (14.34-18.76)        |
| SARS (% 95 CI)                     | 19.05 (7.17-30.92)         | 19.43 (17.08-21.78)        | 14.87 (12.75-16.99)        | 11.49 (9.59-13.38)         | 10.34 (8.53-12.16)         | 6.47 (5.01-7.94)           |
| AKI (% 95 CI)                      | 7.14 (0.65-13.93)          | 12.15 (10.21-14.1)         | 16.51 (14.3-18.72)         | 18.24 (15.95-20.54)        | 22.41 (19.93-24.89)        | 9.35 (7.62-11.08)          |
| SIRS (% 95 CI)                     | 4.76 (0.68-9.2)            | 2.3 (1.41-3.19)            | 1.77 (0.99-2.56)           | 2.03 (1.19-2.87)           | 3.45 (2.36-4.53)           | 0 (0-0)                    |
| Bacterial superinfection (% 95 CI) | 4.76 (0.68-9.2)            | 2.21 (1.34-3.08)           | 5.05 (3.75-6.35)           | 4.73 (3.47-5.99)           | 6.9 (5.39-8.4)             | 7.19 (5.66-8.73)           |
| Fungal superinfection (% 95 CI)    | 2.38 (0.23-4.99)           | 2.03 (1.19-2.86)           | 3.68 (2.56-4.8)            | 3.83 (2.69-4.97)           | 9.77 (8-11.54)             | 3.6 (2.49-4.7)             |
| Carotidomypath (% 95 CI)           | 4.76 (0.68-9.2)            | 2.12 (1.26-2.97)           | 2.18 (1.31-3.05)           | 3.38 (2.3-4.45)            | 1.72 (0.95-2.5)            | 0.72 (0.22-1.22)           |
| DIC (% 95 CI)                      | 2.38 (0.23-4.99)           | 0.18 (0.07-0.30)           | 0.14 (0.08-0.20)           | 0 (0-0)                    | 0.57 (0.13-1.02)           | 0 (0-0)                    |

Abbreviations: 95 CI, confidence interval, SARS, severe acute respiratory syndrome, AKI, acute kidney injury, SIRS, systemic inflammatory response syndrome, ICU, intensive care unit, LoS, length of stay, DIC, disseminated intravascular coagulation.
